# Supplementary material
Source: HighWire-hosted journal article supplement (https://erj.ersjournals.com/content/59/3/2101209)
Supplement: inline-supplementary-material-3 [file inline-supplementary-material-3.pdf]

## **Systematic Review Search Strategy**

**A living systematic review and meta-analysis of COVID-19 risk among people with asthma**

***Anthony Paulo Sunjaya, Sabine Allida, Christine Jenkins, Gian Luca di Tanna***

***The George Institute for Global Health, UNSW Sydney***

(coronavirus [MeSH]) OR

("coronavirus infections"[MeSH Terms]) OR

(coronavirus [All Fields]) OR

("covid 2019") OR

("SARS2") OR

("SARS-CoV-2") OR

("SARS-CoV-19") OR

("severe acute respiratory syndrome coronavirus 2" [supplementary concept]) OR

(coronavirus infection) OR

("severe acute respiratory" pneumonia outbreak) OR

("novel cov") OR

(2019ncov) OR

(sars cov2) OR

(cov2) OR

(ncov) OR

(covid-19) OR

(covid19) OR

(coronaviridae) OR

("corona virus")
